# Supplementary material
Source: PubMed Central journal article supplement (PMC6824003)

**Supplemental Table 1.** Initially selected cell markers for identifying cell types in skeletal muscle

| <b>Cell Type</b>                 | <b>Markers</b>                                          | <b>References</b> |
|----------------------------------|---------------------------------------------------------|-------------------|
| MSC                              | CD73, CD90, CD105, CD271                                | (31, 75)          |
| Pericytes                        | CD146, NG2, alkaline phosphatase, $\alpha$ SMA and CD90 | (16,17,29, 34)    |
| Myogenic cells                   | CD56                                                    | (76)              |
| Interstitial cells               |                                                         |                   |
| Fibroblasts                      | TCF7L2, CD34                                            | (8,15)            |
| Telocytes                        | CD34                                                    | (8)               |
| Fibroadipogenic progenitor cells | PDGFR $\alpha$ , CD15                                   | (6,7)             |

**Supplemental Table 2. Materials Used in the Study**

| <b>Healthy muscle</b>                            | Age<br>/years | <b>Atrophy</b>                                                          | Age<br>/years |
|--------------------------------------------------|---------------|-------------------------------------------------------------------------|---------------|
| Normal                                           | 0.2           | Plantar muscle, angioma                                                 | 28            |
| Normal                                           | 2             | Type 2 atrophy                                                          | 74            |
| Normal                                           | 2             | Supraspinatus, type 2 atrophy                                           | 61            |
| Normal                                           | 5             | Type 2 atrophy                                                          | 62            |
| Normal                                           | 11            | <b>Inflammation</b>                                                     |               |
| Normal                                           | 15            | Absces                                                                  | 10            |
| Normal                                           | 15            | Dermatomyositis, S3: NG2/ $\alpha$ SMA                                  | 25            |
| Temporalis, RC                                   | 24            | Dermatomyositis                                                         | 33            |
| Normal                                           | 26            | Polymyositis, anti-synthetase syndrome                                  | 43            |
| Normal                                           | 30            | Extra ocular, myositis (IgG4)                                           | 45            |
| Tongue                                           | 30            | IBM                                                                     | 53            |
| Normal                                           | 31            | Intercostal muscle, necrosis                                            | 54            |
| RC                                               | 31            | IMN, Fig. 4A, S2: CD45; TCF7L2 C, D, E and G; AP E and F and S3: nestin | 55            |
| RC                                               | 33            | IBM                                                                     | 61            |
| Fig. 2 and S3: CD90 and CD146                    | 45            | IBM                                                                     | 62            |
| RC                                               | 50            | Dermatomyositis sarcoidosis                                             | 62            |
| Pectoralis, RC                                   | 50            | IBM                                                                     | 63            |
| RC                                               | 51            | IMN, Fig. 1B                                                            | 67            |
| Normal                                           | 54            | IMN, statin induced                                                     | 68            |
| Fig. S2: TCF7L2 A and B                          | 58            | IBM                                                                     | 68            |
| Normal                                           | 73            | IBM                                                                     | 70            |
| RC                                               | 74            | IBM, Fig.1A                                                             | 71            |
|                                                  |               | IBM                                                                     | 71            |
|                                                  |               | Slight inflammation                                                     | 73            |
| <b>Denervation</b>                               |               |                                                                         |               |
| Denervation                                      | 7             | IBM, Fig. 4B, Fig. 5 and Fig. 7C                                        | 76            |
| Neurogenic atrophy, Fig. 7B, S3:<br>$\alpha$ SMA | 17            | IBM fatty degeneration                                                  | 79            |
| Kennedys disease, Fig. 7A                        | 49            | IBM fatty degeneration                                                  | 70            |
| Denervation                                      | 51            |                                                                         |               |
| Gastrocnemius                                    | 57            | <b>Ischemia</b>                                                         |               |
| Denervation                                      | 57            | Gracilis, compartment syndrome, Fig. 6                                  | 37            |
| Denervation                                      | 67            | Triceps surae                                                           | 60            |
| Denervation                                      | 68            | Triceps surae                                                           | 73            |
| Denervation                                      | 75            | Triceps surae                                                           | 75            |
|                                                  |               | Triceps surae                                                           | 85            |
| <b>Myopathy</b>                                  |               |                                                                         |               |
| Degenerative changes/myopathy                    | 2             | Triceps surae                                                           | 90            |
| Congenital myopathy                              | 2             | <b>Ectopic</b>                                                          |               |
| Degenerative changes                             | 29            | Skin, rhabdomyomatous harmatoma, S1                                     | 11            |
| Vacuolar myopathy                                | 40            |                                                                         |               |
| Degenerative changes, S4                         | 41            |                                                                         |               |
| Degenerative changes, mitochondrial myopathy     | 74            |                                                                         |               |
| Degenerative changes/myopathy                    | 79            |                                                                         |               |

The biopsies were taken from m. quadriceps unless another muscle is stated. INM: Immune-mediated necrotizing myopathy, IBM: inclusion body myositis, RC: reactive changes, AP:alkaline phosphatase



**S1.** Expression of endomysial CD10 in different skeletal muscles. A: In this example of ectopic skeletal muscle, CD10 is expressed between muscle fibers in a cutaneous hamartoma consistent with hamartomas being composed of all normal components of a tissue. However, in the interface between muscle fibers (f) and connective tissue the CD10 expression is scarce or absent.

Rhabdomyomatous mesenchymal hamartoma of the skin. B-F: CD10 expression in various skeletal muscles. B: external eye muscle (IgG4 disease), C: m. pectoralis major, D: m. temporalis, E: pharynx muscle and F: tongue.

A: scale bar = 100  $\mu\text{m}$ , B-F: scale bar = 100  $\mu\text{m}$

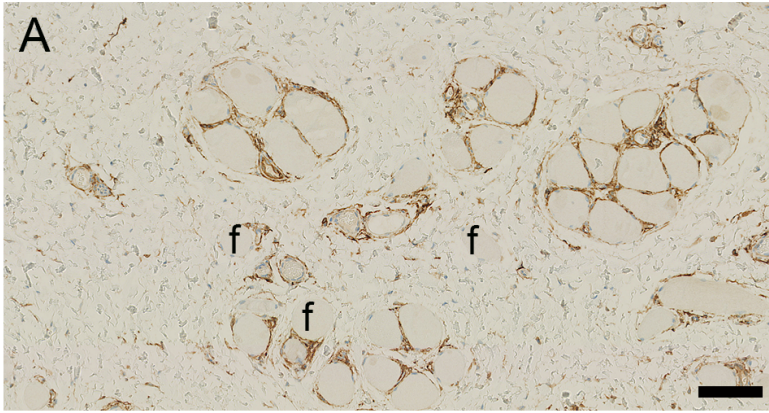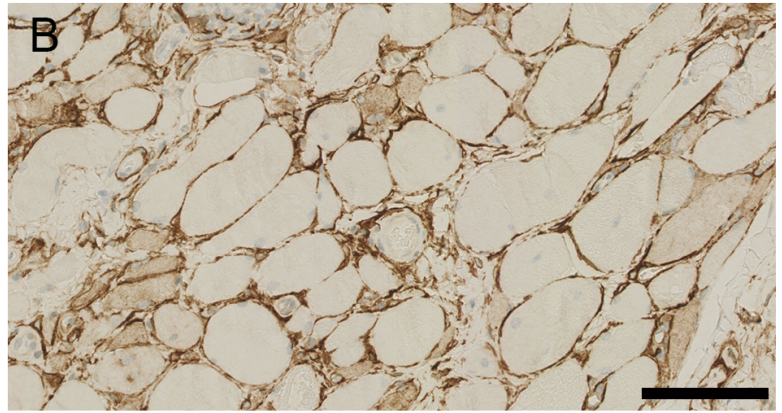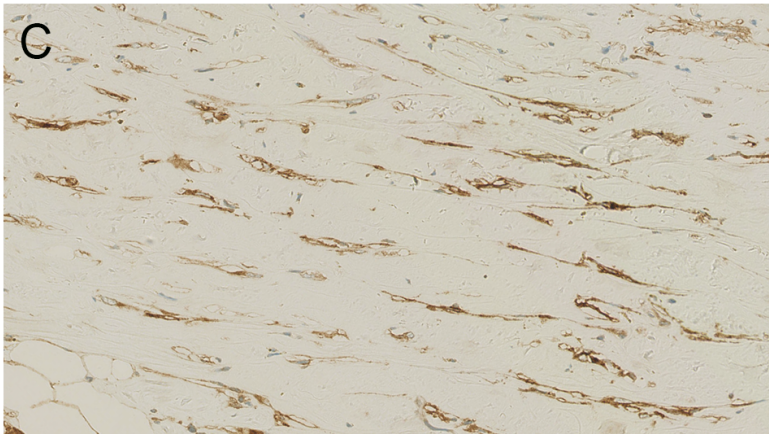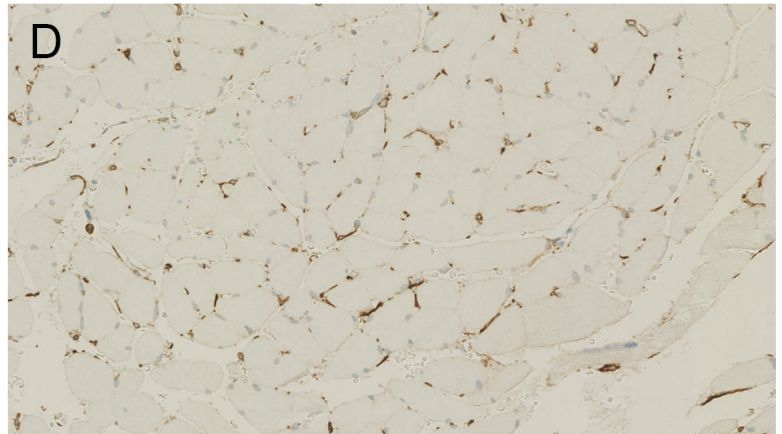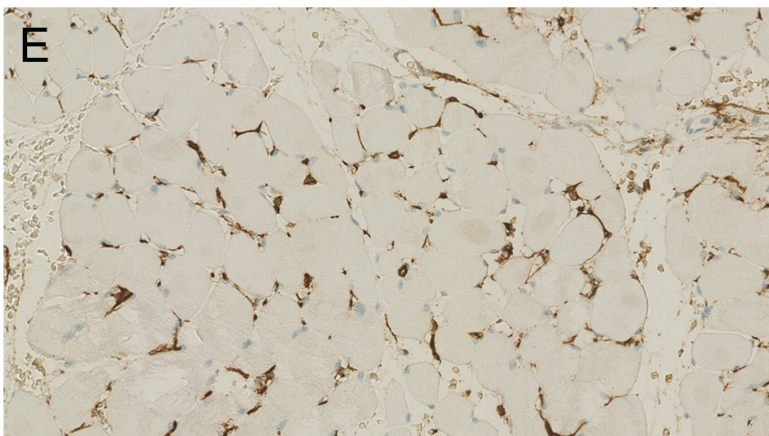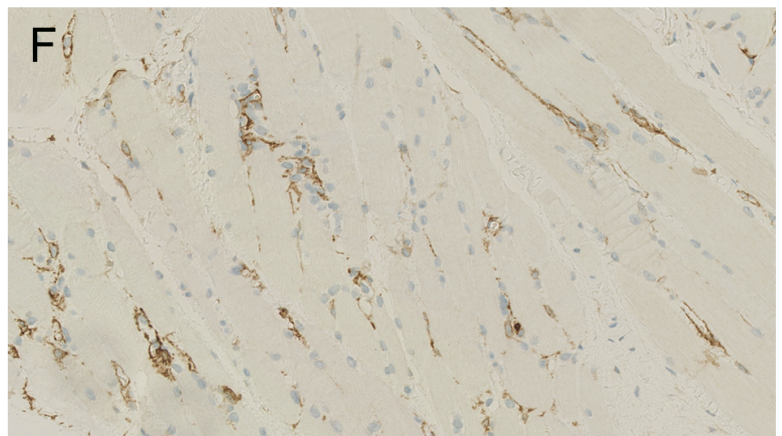

## S2. CD45, TCF7L2 and alkaline phosphatase

CD45: CD10+ cells do not express CD45 shown by SIMPLE. Scale bar = 100  $\mu\text{m}$

TCF7L2: A and B: the anti-TCF7L2 diluted 1:200 and 1:1000 respectively (healthy muscle) and C, D, and E the anti-TCF7L2 diluted 1:200, 1:400 and 1:1000 respectively. A reduction in antibody concentration results in a reduced number of TCF7L2 positive nuclei. C, D, E and G show interstitial cells in an immune mediated necrotizing myopathy. F and G show double staining for CD10 (red) and TCF7L2 (brown). F: An interstitial CD10+/ TCF7L2+ cell (arrow) in normal muscle. In capillaries (c) TCF7L2 is strongly expressed in endothelial cells but also stains adventitial cells. G: In damaged muscle both CD10+ cells with TCF7L2 (black arrows) and without TCF7L2 (white arrows) are seen. Scale bar for A-E and G = 100  $\mu\text{m}$ , F=50  $\mu\text{m}$ .

Alkaline phosphatase: Alkaline phosphatase expression shown by enzyme histochemistry (A and D), single immunohistochemistry (B and E) and in combination with  $\alpha\text{SMA}$  or CD10 (C and F). A and B: alkaline phosphatase is seen in endothelial cells. C:  $\alpha\text{SMA}$  (red) combined with alkaline phosphatase (brown) demonstrates the  $\alpha\text{SMA}+$  pericyte surrounding the alkaline phosphatase+ endothelial cells. D: Enzyme histochemistry for alkaline phosphatase in damaged muscle shows staining in the periphery of damaged fibers. E: Alkaline phosphatase is widely distributed in interstitial cells in damaged muscle. F: CD10+ cells (red) are seen together with alkaline phosphatase (brown, black arrows) or without alkaline phosphatase (white arrows). A-C: biopsies from normal muscle, D: from a toxic myopathy and E and F: from an immune mediated necrotizing myopathy. Scale bar for A, B, C, D and F= 50  $\mu\text{m}$  and E=250  $\mu\text{m}$ .



CD45

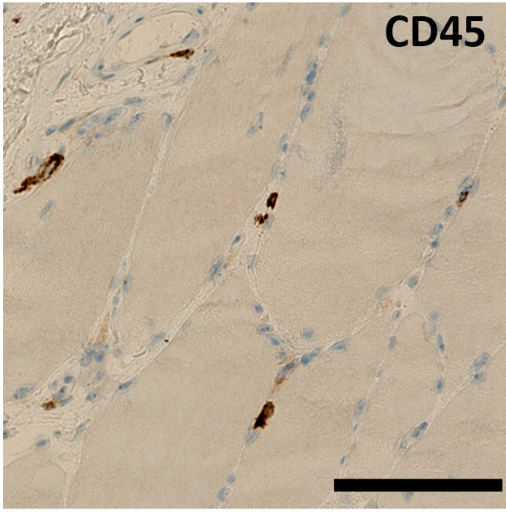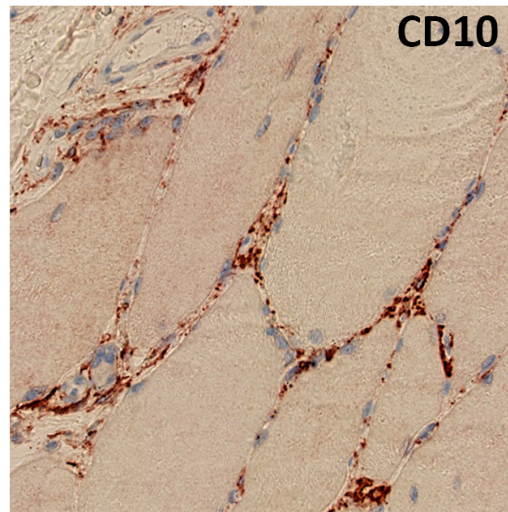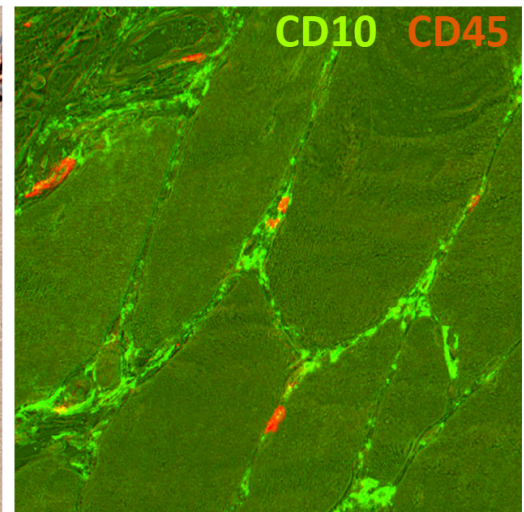

TCF7L2

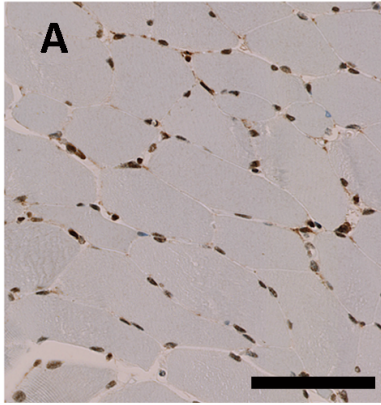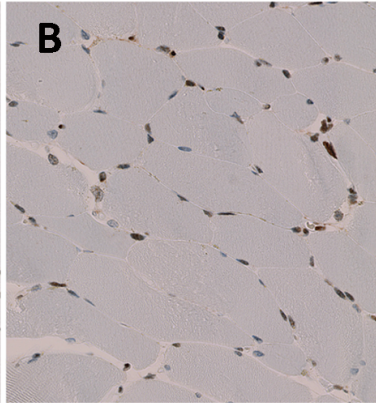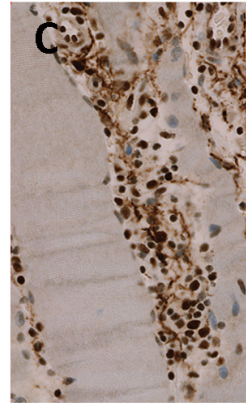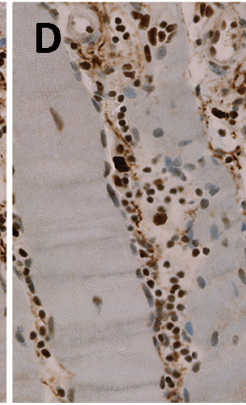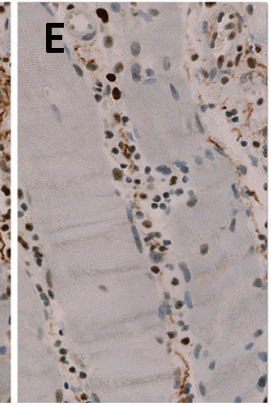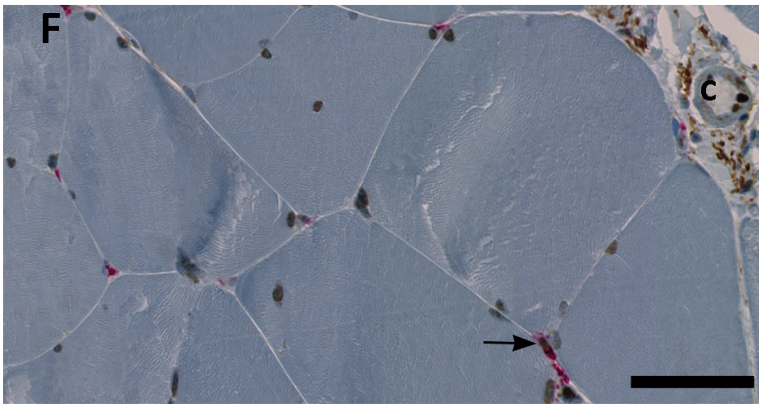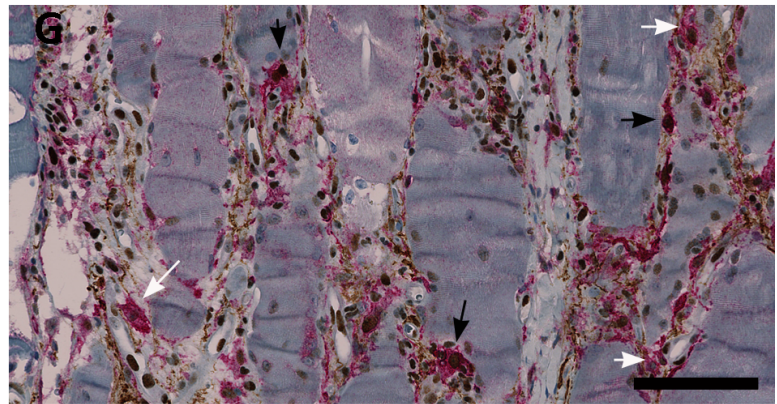

Alkaline phosphatase

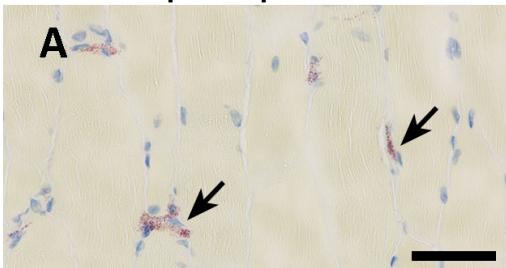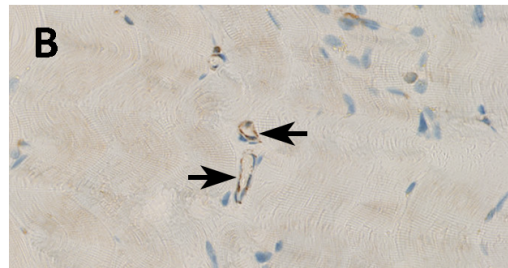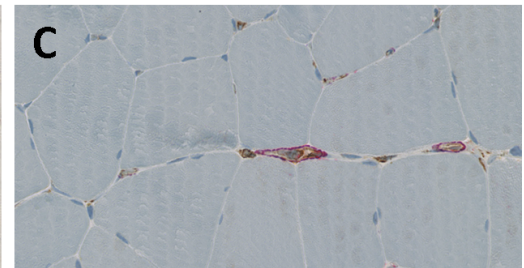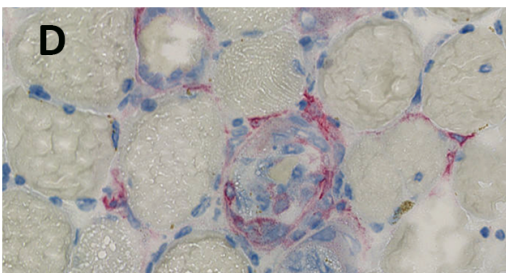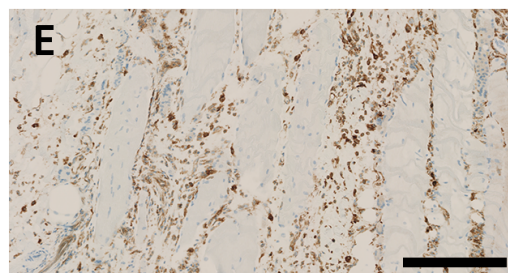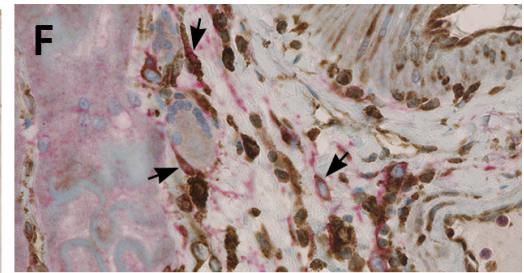



### **S3. Marker expression in pericytes.**

$\alpha$ SMA, CD146 and CD90 are expressed in pericytes (arrows) while CD10 is present at the abluminal side of the endomysial pericytes. Nestin can be found in some pericytes (arrows).

$\alpha$ SMA<sup>+</sup> cells also express NG2 (arrow heads) indicating that  $\alpha$ SMA in the endomysium stains pericytes. CD10 combined with  $\alpha$ SMA, CD146 and CD90 were shown by SIMPLE. The

NG2/ $\alpha$ SMA staining was performed with immunofluorescence on cryosections.

Scale bars for  $\alpha$ SMA, CD90 and nestin = 50  $\mu$ m and scale bar for CD146 = 100  $\mu$ m



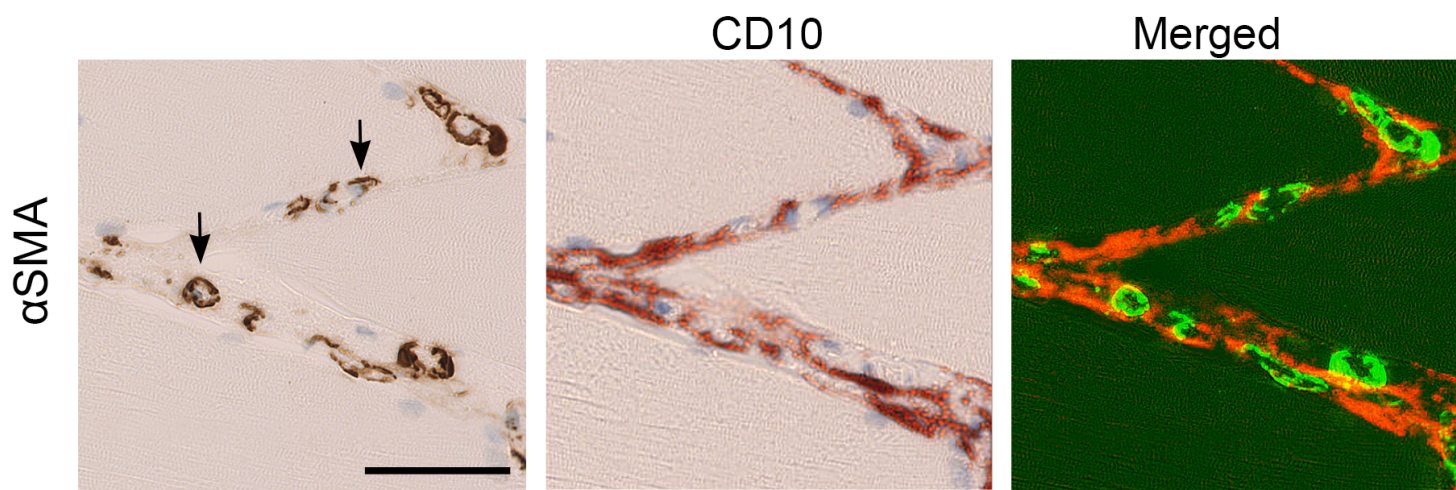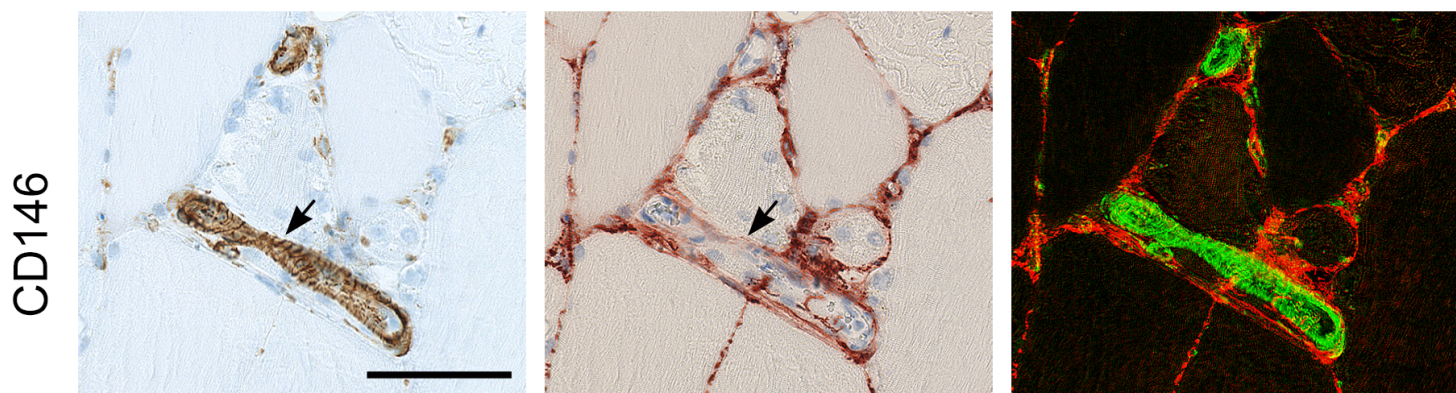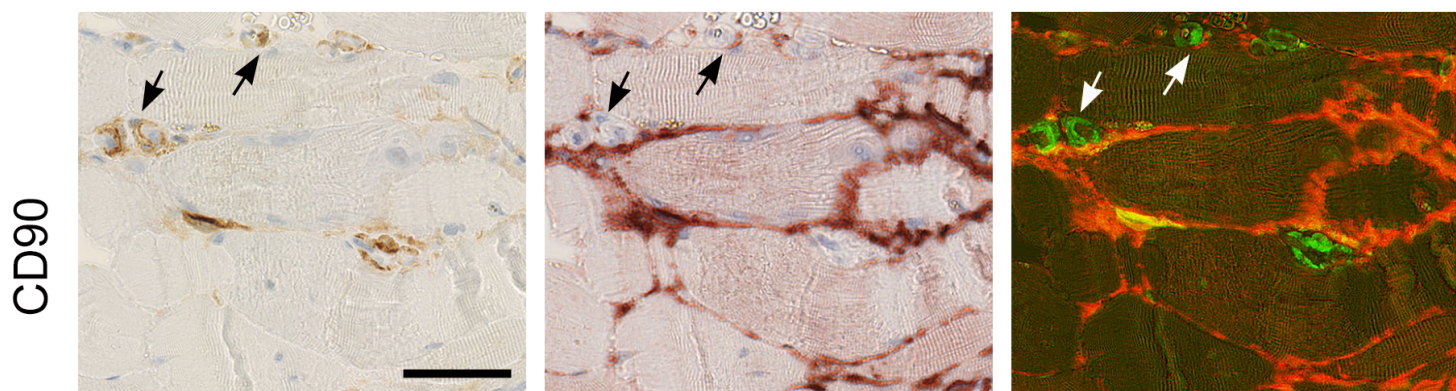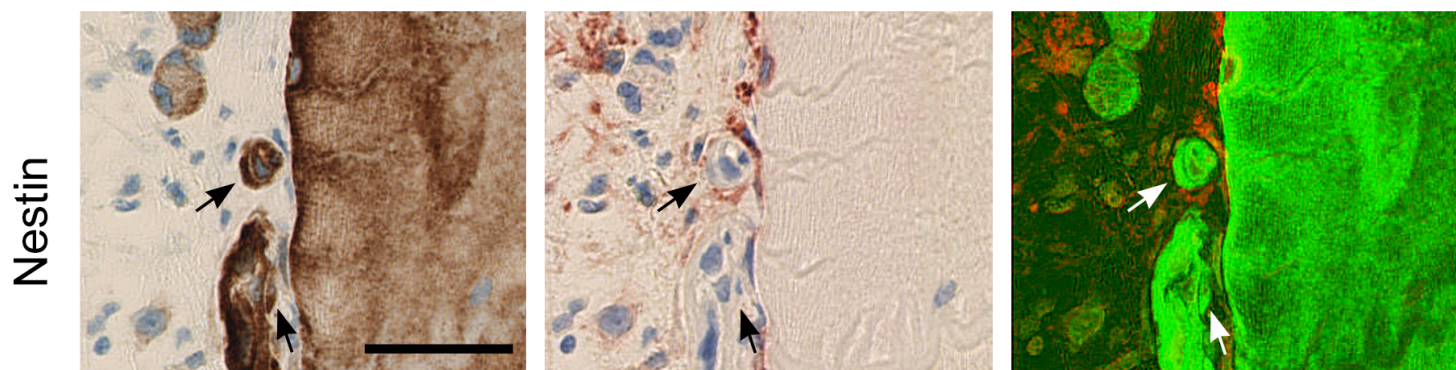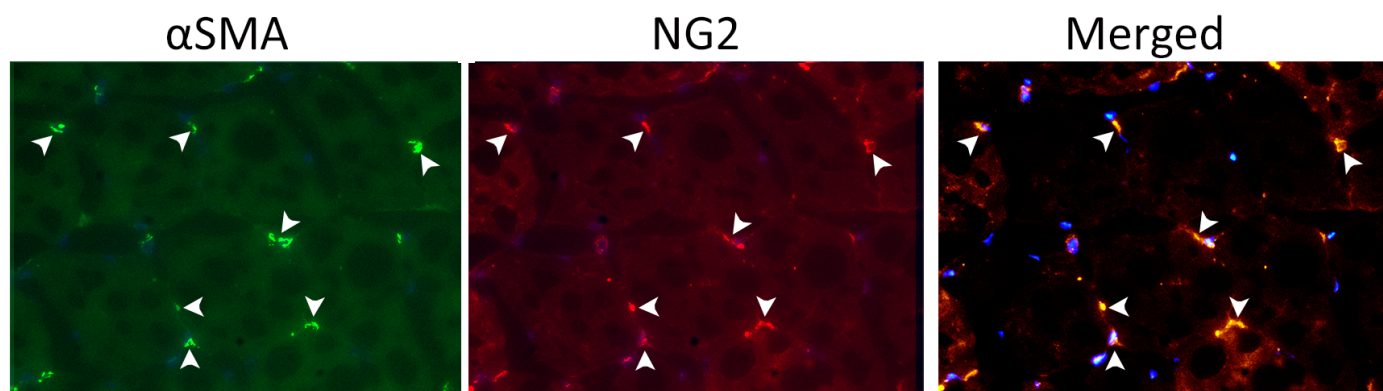



#### **S4. Blood vessels**

In blood vessels, CD10 is seen in adventitia particularly adjacent to the media. CD90 is found in the inner adventitia where it co-localizes with CD10. CD73 is present in the adventitia and partly co-localizes with CD10. In addition endothelial cells are stained. CD34 is expressed in the adventitia and endothelial cells. In adventitia CD34 co-localizes with CD10 particularly in the inner layer close to media. PDGFR $\alpha$  co-localizes with CD10 in the outer layer of adventitia. CD271 co-localizes with CD10 in the adventitia. SIMPLE technique was used.

Scale bar = 100  $\mu$ m



CD90

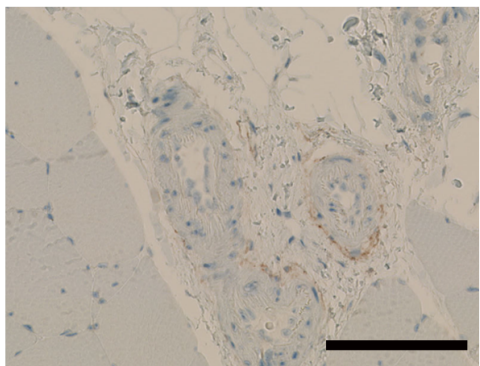

CD10

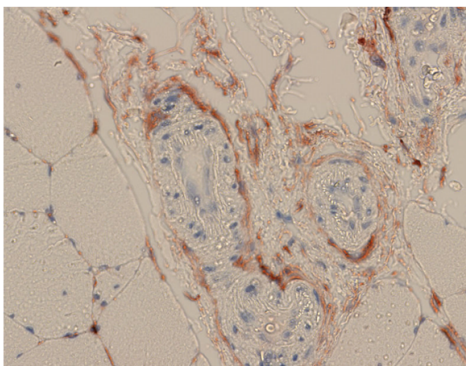

merged

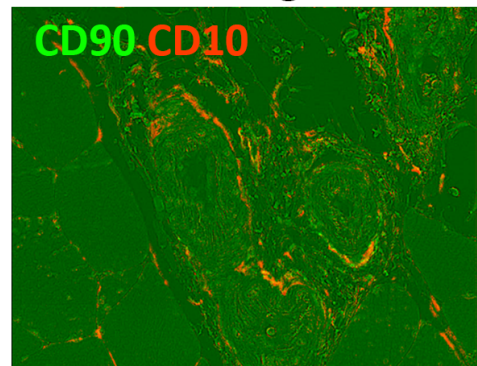

CD73

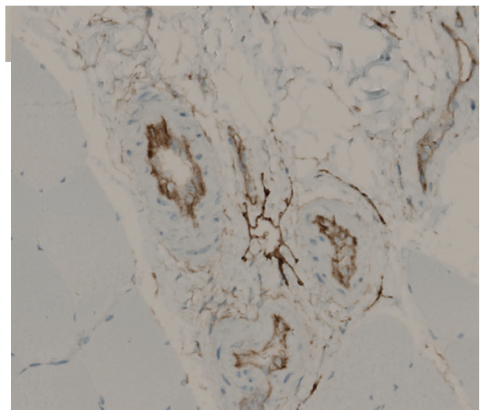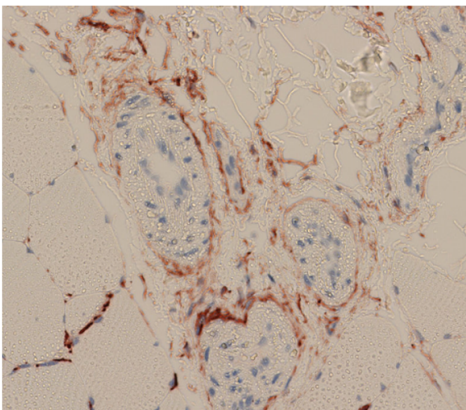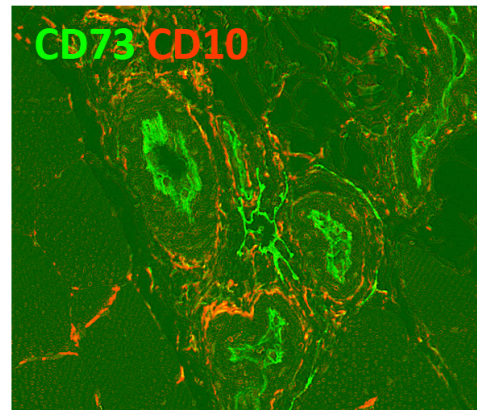

CD34

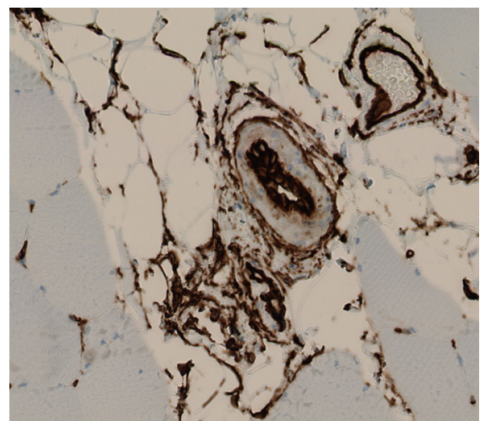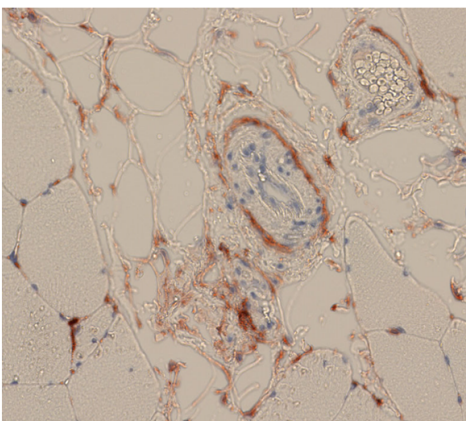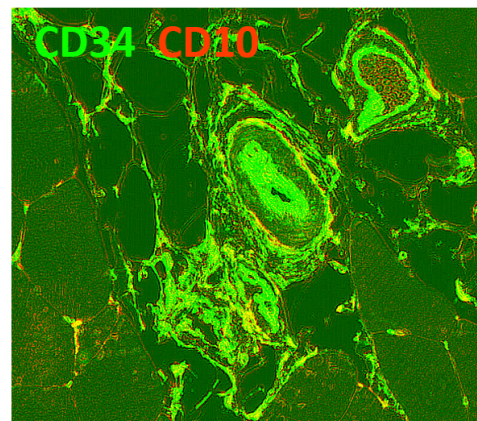

PDGFR $\alpha$

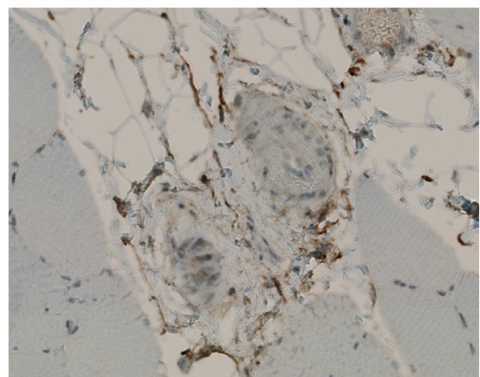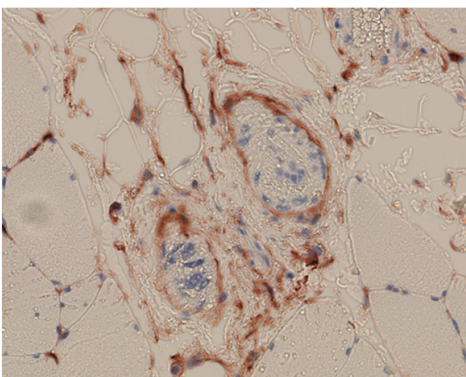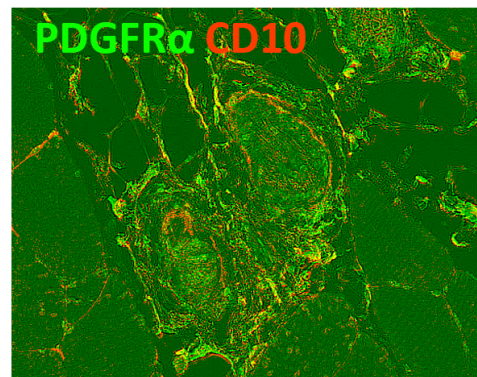

CD271

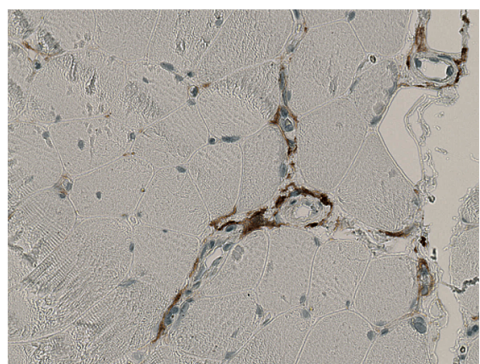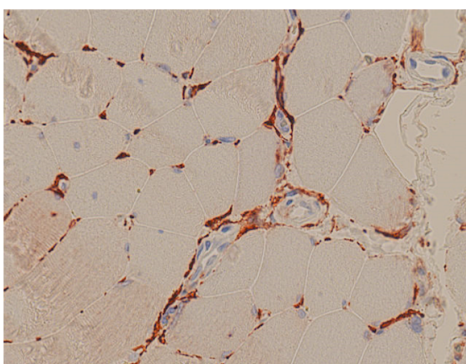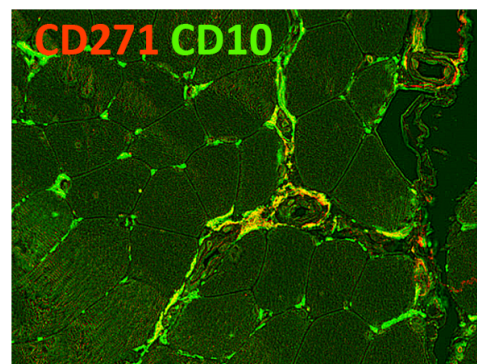



## S5. Nerve

In intra muscular nerves CD10 in myelinating Schwann cells co-localize with CD271 and PDGFR $\alpha$  and with CD271 in perineurium. No co-localization is found with CD34

Scale bar= 50  $\mu$ m.

CD271

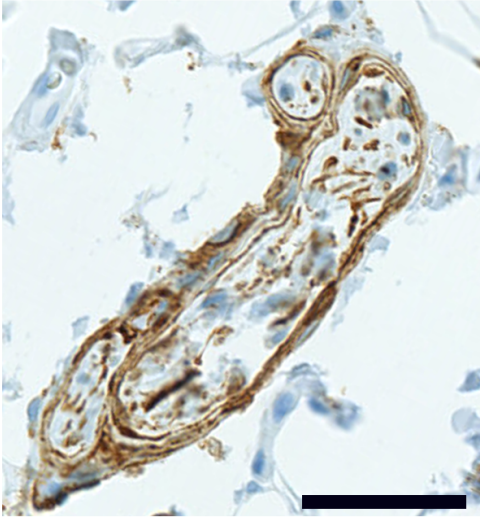

CD10

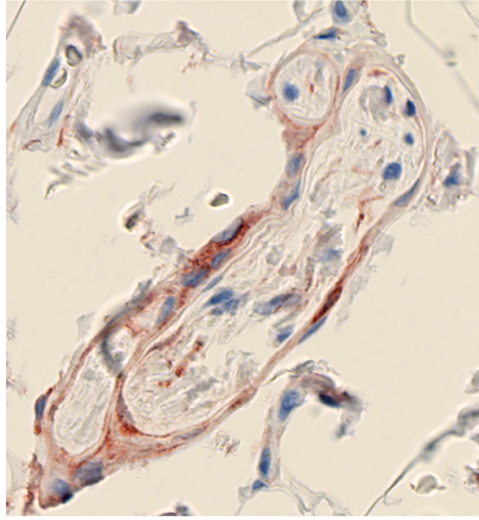

merged

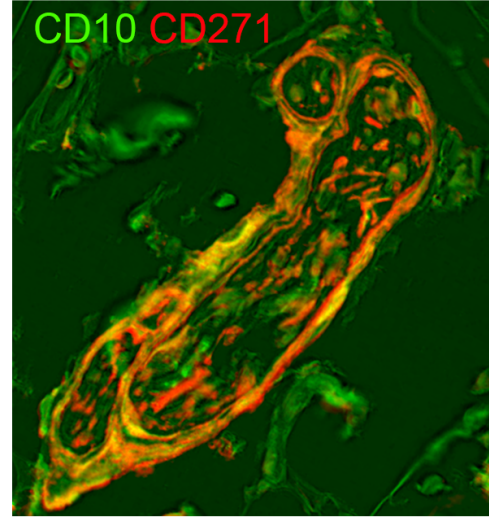

CD34

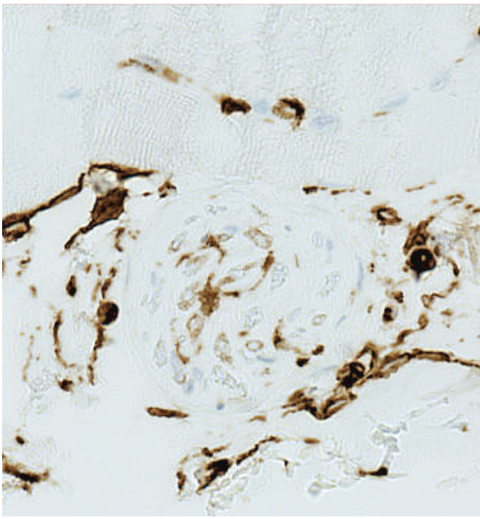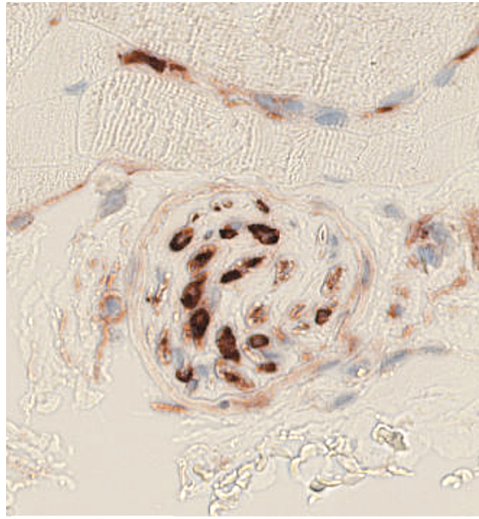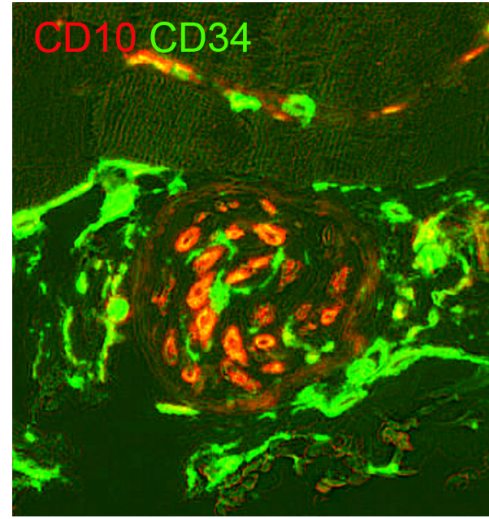

PDGFR $\alpha$

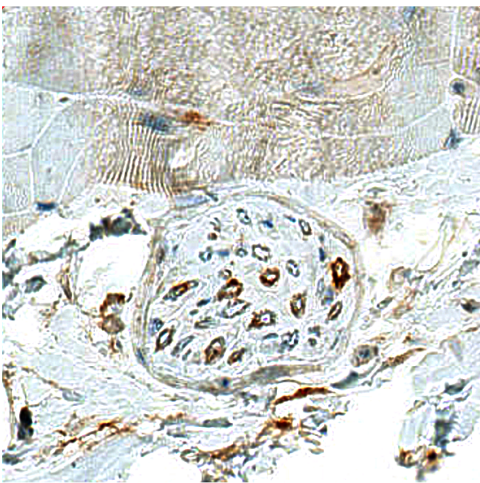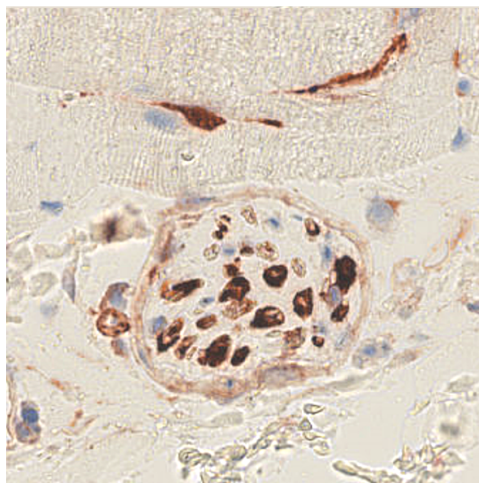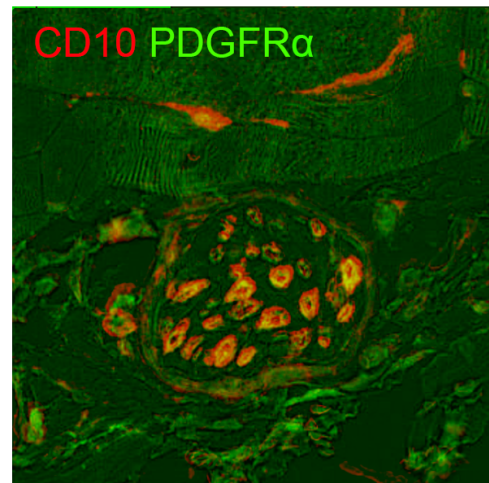

Supplement: DS_10.1369_0022155419871033.pdf [file DS_10.1369_0022155419871033.pdf]
